# Supplementary material for: Fluvio-deltaic record of increased sediment transport during the Middle Eocene Climatic Optimum (MECO), Southern Pyrenees, Spain
Source: Copernicus journal article supplement (doi:10.5194/cp-19-533-2023), 2023-03-08
Supplement: Supplementary file 1 [file cp-19-533-2023-supplement.zip]

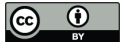

*Supplement of*

**Fluvio-deltaic record of increased sediment transport during the Middle Eocene Climatic Optimum (MECO), Southern Pyrenees, Spain**

**Sabí Peris Cabré et al.**

*Correspondence to:* Sabí Peris Cabré ([sabi.peris@uab.cat](mailto:sabi.peris@uab.cat))

- [cp-19-533-2023-supplement-title-page.pdf](#)
- [Results.xlsx](#)
- [Supplementary material MECO paper.pdf](#)

The copyright of individual parts of the supplement might differ from the article licence.
