# Supplementary material for: Fluvio-deltaic record of increased sediment transport during the Middle Eocene Climatic Optimum (MECO), Southern Pyrenees, Spain
Source: Copernicus journal article supplement (doi:10.5194/cp-19-533-2023), 2023-03-08
Supplement: Supplementary file 2 [file cp-19-533-2023-supplement.zip]

*Supplement of*

**Fluvio-deltaic record of increased sediment transport during the Middle Eocene Climatic Optimum (MECO), Southern Pyrenees, Spain**

**Sabí Peris Cabré et al.**

*Correspondence to:* Sabí Peris Cabré ([sabi.peris@uab.cat](mailto:sabi.peris@uab.cat))

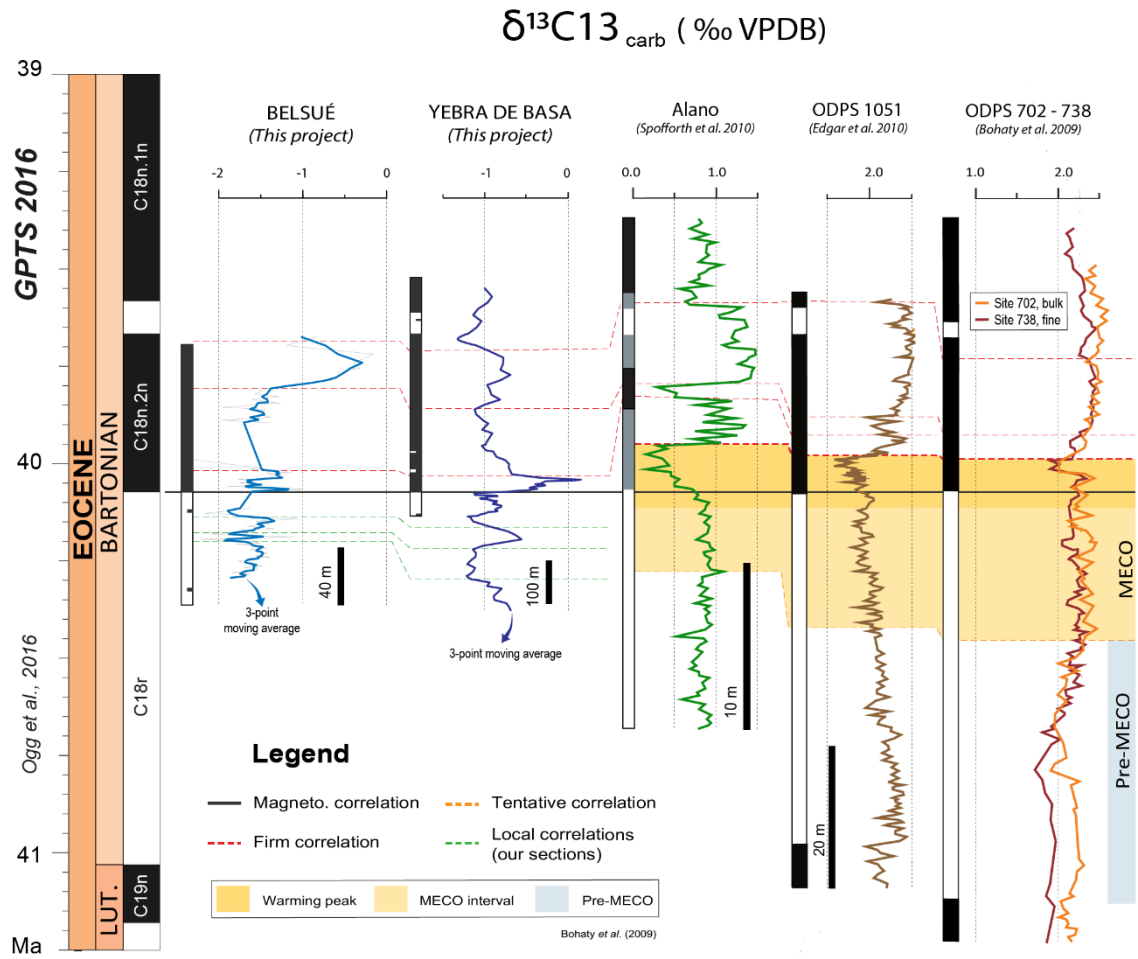

**Figure S1:** Carbon isotopic ( $\delta^{13}\text{C}_{\text{carb}}$ ) correlation panel for the studied sections (Belsué and Yebra de Basa) with MECO target curves from Alano (Italy, Tethys ocean, Spofforth et al., 2010), ODPS 1051 (N Atlantic Ocean; Edgar et al., 2010), ODPS 702 (S Atlantic Ocean; Bohaty et al., 2009) and ODPS 738 (S Indic Ocean; Bohaty et al., 2009). Data from the bulk and fine sediments fractions. Complement figure of Figure 10 in the manuscript.

|       | SiO2         | TiO2         | Al2O3        | Fe2O3        | FeO | MnO         | MgO   | CaO   | Na2O         | K2O          | P2O5         | LOI       | Cr2O3 | NiO |
|-------|--------------|--------------|--------------|--------------|-----|-------------|-------|-------|--------------|--------------|--------------|-----------|-------|-----|
| SiO2  | 1            |              |              |              |     |             |       |       |              |              |              |           |       |     |
| TiO2  | <b>0,88</b>  | 1            |              |              |     |             |       |       |              |              |              |           |       |     |
| Al2O3 | <b>0,75</b>  | <b>0,94</b>  | 1            |              |     |             |       |       |              |              |              |           |       |     |
| Fe2O3 | <b>0,79</b>  | <b>0,94</b>  | <b>0,98</b>  | 1            |     |             |       |       |              |              |              |           |       |     |
| FeO   | 0            | 0            | 0            | 0            | 1   |             |       |       |              |              |              |           |       |     |
| MnO   | 0,22         | 0,23         | 0,21         | 0,15         | 0   | 1           |       |       |              |              |              |           |       |     |
| MgO   | 0,19         | 0,17         | 0,24         | 0,17         | 0   | <b>0,79</b> | 1     |       |              |              |              |           |       |     |
| CaO   | -0,17        | -0,38        | -0,48        | -0,47        | 0   | 0,51        | 0,23  | 1     |              |              |              |           |       |     |
| Na2O  | <b>0,88</b>  | 0,68         | 0,45         | 0,51         | 0   | 0,00        | -0,04 | -0,15 | 1            |              |              |           |       |     |
| K2O   | <b>0,74</b>  | <b>0,90</b>  | <b>0,99</b>  | <b>0,96</b>  | 0   | 0,26        | 0,34  | -0,46 | 0,41         | 1            |              |           |       |     |
| P2O5  | <b>0,84</b>  | 0,60         | 0,45         | 0,48         | 0   | 0,48        | 0,37  | 0,32  | <b>0,73</b>  | 0,47         | 1            |           |       |     |
| LOI   | <b>-0,92</b> | <b>-0,82</b> | <b>-0,71</b> | <b>-0,73</b> | 0   | -0,49       | -0,36 | -0,15 | <b>-0,72</b> | <b>-0,70</b> | <b>-0,92</b> | 1         |       |     |
| Cr2O3 | <b>0,92</b>  | <b>0,81</b>  | <b>0,70</b>  | <b>0,73</b>  | 0   | 0,49        | 0,37  | 0,16  | <b>0,72</b>  | <b>0,70</b>  | <b>0,92</b>  | <b>-1</b> | 1     |     |
| NiO   | 0            | 0            | 0            | 0            | 0   | 0           | 0     | 0     | 0            | 0            | 0            | 0         | 0     | 1   |

Table S1: Belsué coefficient correlation (r) between the major and trace elements. Highlighted in bold the higher values (>0,7)

|       | SiO2         | TiO2        | Al2O3       | Fe2O3       | FeO | MnO   | MgO   | CaO   | Na2O  | K2O   | P2O5  | LOI   | Cr2O3 | NiO |
|-------|--------------|-------------|-------------|-------------|-----|-------|-------|-------|-------|-------|-------|-------|-------|-----|
| SiO2  | 1            |             |             |             |     |       |       |       |       |       |       |       |       |     |
| TiO2  | 0,28         | 1           |             |             |     |       |       |       |       |       |       |       |       |     |
| Al2O3 | 0,04         | <b>0,91</b> | 1           |             |     |       |       |       |       |       |       |       |       |     |
| Fe2O3 | 0,15         | <b>0,78</b> | <b>0,87</b> | 1           |     |       |       |       |       |       |       |       |       |     |
| FeO   | 0            | 0           | 0           | 0           | 1   |       |       |       |       |       |       |       |       |     |
| MnO   | 0,12         | 0,52        | 0,58        | 0,68        | 0   | 1     |       |       |       |       |       |       |       |     |
| MgO   | <b>-0,81</b> | -0,25       | 0,02        | -0,20       | 0   | -0,19 | 1     |       |       |       |       |       |       |     |
| CaO   | -0,61        | -0,68       | -0,55       | -0,57       | 0   | -0,37 | 0,55  | 1     |       |       |       |       |       |     |
| Na2O  | 0,62         | -0,06       | -0,23       | -0,35       | 0   | -0,39 | -0,28 | -0,26 | 1     |       |       |       |       |     |
| K2O   | 0,06         | <b>0,86</b> | <b>0,98</b> | <b>0,85</b> | 0   | 0,52  | 0,08  | -0,54 | -0,14 | 1     |       |       |       |     |
| P2O5  | -0,35        | 0,51        | 0,65        | 0,51        | 0   | 0,46  | 0,51  | -0,26 | -0,35 | 0,66  | 1     |       |       |     |
| LOI   | -0,45        | -0,39       | -0,41       | -0,42       | 0   | -0,39 | 0,14  | 0,06  | -0,15 | -0,44 | -0,11 | 1     |       |     |
| Cr2O3 | 0,43         | 0,40        | 0,42        | 0,43        | 0   | 0,37  | -0,12 | -0,04 | 0,15  | 0,46  | 0,11  | -1,00 | 1     |     |
| NiO   | -0,09        | 0,68        | <b>0,81</b> | <b>0,78</b> | 0   | 0,60  | -0,02 | -0,30 | -0,39 | 0,77  | 0,47  | -0,37 | 0,38  | 1   |

Table S2: Yebra de Basa coefficient correlation (r) between the major and trace elements. Highlighted in bold the higher values (>0,7)
